# Supplementary material
Source: PubMed Central journal article supplement (PMC8906845)
Supplement: NIHMS1710688-supplement-1.pdf [file NIHMS1710688-supplement-1.pdf]

**Supplementary Table 1:** Multivariable Cox proportional hazard model for pelvic fractures in female patients with a step function to separate the proportional hazard from brachytherapy into before and after 2 years.

|                                        |                                           | <b>Pelvic Fracture</b> |               |
|----------------------------------------|-------------------------------------------|------------------------|---------------|
|                                        |                                           | <b>HR (95% CI)</b>     |               |
| <b>RT (Ref: 3DRT)</b>                  | <i>Brachytherapy Alone (0-2 years)</i>    | 0.28*                  | (0.20 – 0.39) |
|                                        | <i>Brachytherapy Alone (&gt; 2 years)</i> | 0.63*                  | (0.47-0.84)   |
|                                        | <i>IMRT</i>                               | 0.84*                  | (0.72-0.99)   |
| <b>Age (per 10 years)</b>              |                                           | 1.93*                  | (1.76-2.11)   |
| <b>Race (Ref: White)</b>               | <i>Black</i>                              | 0.46*                  | (0.34-0.61)   |
|                                        | <i>Other</i>                              | 0.57*                  | (0.43-0.77)   |
| <b>Primary (Ref: Rectal)</b>           | <i>Cervical</i>                           | 1.38*                  | (1.14-1.68)   |
|                                        | <i>Endometrial</i>                        | 0.75*                  | (0.64-0.88)   |
|                                        | <i>Anal</i>                               | 1.21                   | (0.99-1.51)   |
|                                        | <i>Prostate</i>                           | NA                     |               |
| <b>Chemotherapy</b>                    |                                           | 0.92                   | (0.80-1.06)   |
| <b>ADT</b>                             |                                           | NA                     |               |
| <b>Stage (Ref: I-II)</b>               | <i>III-IV</i>                             | 1.28*                  | (1.12-1.48)   |
| <b>CCI (Ref: 0)</b>                    | <i>≥ 1</i>                                | 1.17*                  | (1.03-1.32)   |
| <b>Diagnosis Year (Ref: 2003-2008)</b> | <i>2009-2013</i>                          | 0.91                   | (0.79-1.05)   |

\*indicates p-value < 0.05. #Regression among prostate cancer patients only. Abbreviations: SD, standard deviation; ADT, Androgen Deprivation Therapy; CCI, Charlson Comorbidity Index; RT, Radiation Therapy; 3DRT, 3-Dimensional Conformal RT; IMRT, Intensity Modulated RT.

**Supplementary Table 2: Multivariable Cox Proportional Hazards Model with T<sub>0</sub> set as date of RT start.**

|                                        |                            | Female          |             |                     |             | Male            |             |                     |             |
|----------------------------------------|----------------------------|-----------------|-------------|---------------------|-------------|-----------------|-------------|---------------------|-------------|
|                                        |                            | Pelvic Fracture |             | Non-Pelvic Fracture |             | Pelvic Fracture |             | Non-Pelvic Fracture |             |
|                                        |                            | HR (95% CI)     |             | HR (95% CI)         |             | HR (95% CI)     |             | HR (95% CI)         |             |
| <b>RT (Ref: 3DRT)</b>                  | <i>Brachytherapy Alone</i> | 0.85*           | (0.73-0.99) | 0.99                | (0.83-1.18) | 0.92            | (0.78-1.08) | 0.91                | (0.78-1.07) |
|                                        | <i>IMRT</i>                | 0.43*           | (0.34-0.53) | 0.87                | (0.71-1.05) | 0.76            | (0.52-1.12) | 0.72                | (0.5-1.04)  |
| <b>Age (per 10 years)</b>              |                            | 1.93*           | (1.76-2.11) | 1.56*               | (1.41-1.72) | 2.80*           | (2.48-3.17) | 1.64*               | (1.46-1.86) |
| <b>Race (Ref: White)</b>               | <i>Black</i>               | 0.46*           | (0.34-0.61) | 0.28*               | (0.18-0.41) | 0.56*           | (0.42-0.77) | 0.55*               | (0.42-0.73) |
|                                        | <i>Other</i>               | 0.58*           | (0.43-0.77) | 0.87                | (0.66-1.15) | 0.54*           | (0.4-0.73)  | 0.59*               | (0.45-0.78) |
| <b>Primary (Ref: Rectal)</b>           | <i>Cervical</i>            | 1.35*           | (1.11-1.64) | 1.02                | (0.81-1.3)  | NA              |             | NA                  |             |
|                                        | <i>Endometrial</i>         | 0.78*           | (0.67-0.92) | 0.80*               | (0.68-0.96) | NA              |             | NA                  |             |
|                                        | <i>Anal</i>                | 1.2             | (0.97-1.49) | 0.83                | (0.63-1.08) | 1.01            | (0.54-1.87) | 0.92                | (0.49-1.7)  |
|                                        | <i>Prostate</i>            | NA              |             | NA                  |             | 0.76            | (0.55-1.03) | 0.59*               | (0.44-0.79) |
| <b>Chemotherapy</b>                    |                            | 0.93            | (0.81-1.08) | 0.88                | (0.75-1.03) | 1.04            | (0.74-1.46) | 0.85                | (0.62-1.17) |
| <b>ADT</b>                             |                            | NA              |             | NA                  |             | 1.32*           | (1.14-1.52) | 1.23*               | (1.07-1.41) |
| <b>Stage (Ref: I-II)</b>               | <i>III-IV</i>              | 1.29*           | (1.13-1.48) | 1.02                | (0.87-1.19) | 1.15            | (0.94-1.42) | 1.16                | (0.96-1.41) |
| <b>CCI (Ref: 0)</b>                    | <i>≥ 1</i>                 | 1.17*           | (1.03-1.32) | 1.33*               | (1.16-1.51) | 1.35*           | (1.18-1.55) | 1.32*               | (1.16-1.5)  |
| <b>Diagnosis Year (Ref: 2003-2008)</b> | <i>2009-2013</i>           | 0.91            | (0.79-1.05) | 0.94                | (0.81-1.09) | 0.84            | (0.71-1.01) | 1.00                | (0.85-1.18) |

\*indicates p-value < 0.05. #Regression among prostate cancer patients only. Abbreviations: SD, standard deviation; ADT, Androgen Deprivation Therapy; CCI, Charlson Comorbidity Index; RT, Radiation Therapy; 3DRT, 3-Dimensional Conformal RT; IMRT, Intensity Modulated RT.

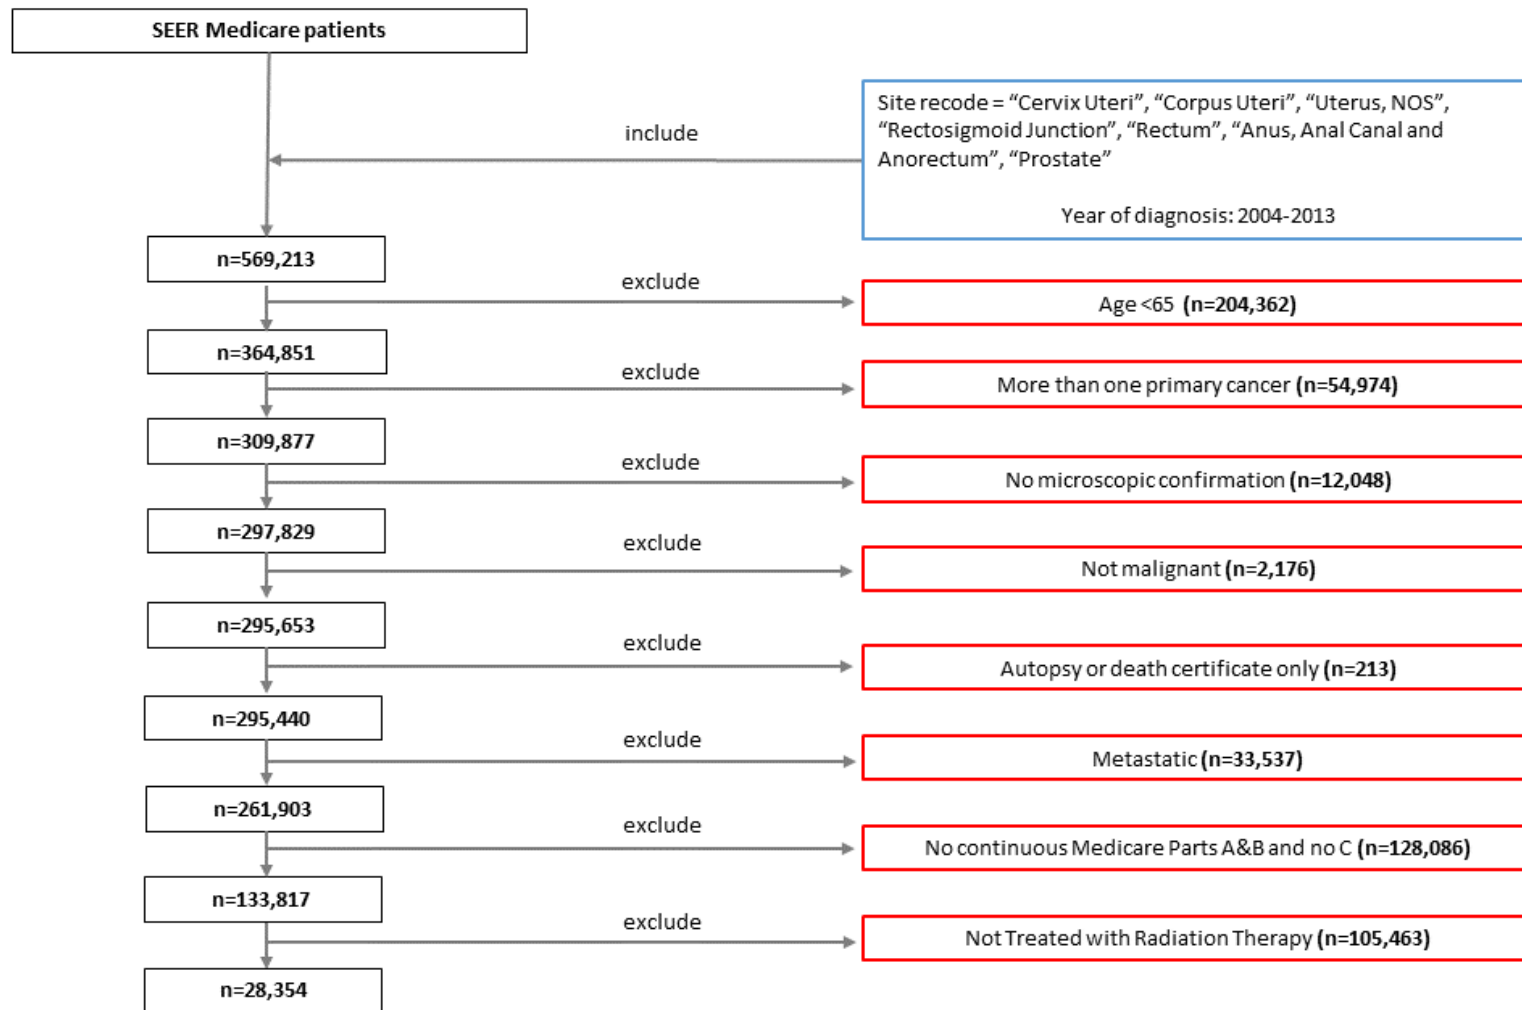

**Supplementary Figure 1.** Patient selection for the cohort showing inclusion and exclusion criteria.

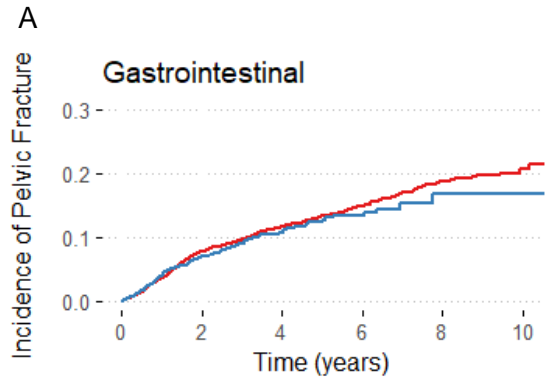

Number at risk

|      |      |      |      |     |     |     |
|------|------|------|------|-----|-----|-----|
| 3DRT | 4019 | 2571 | 1604 | 973 | 482 | 129 |
| IMRT | 1795 | 1007 | 470  | 178 | 51  | ≤10 |

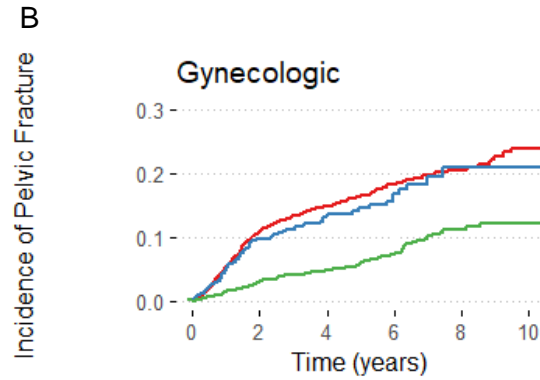

Number at risk

|              |      |      |     |     |     |     |
|--------------|------|------|-----|-----|-----|-----|
| 3DRT         | 1755 | 1575 | 984 | 632 | 326 | 85  |
| IMRT         | 296  | 624  | 287 | 129 | 36  | ≤10 |
| Brachy Alone | 925  | 1375 | 817 | 443 | 202 | 38  |

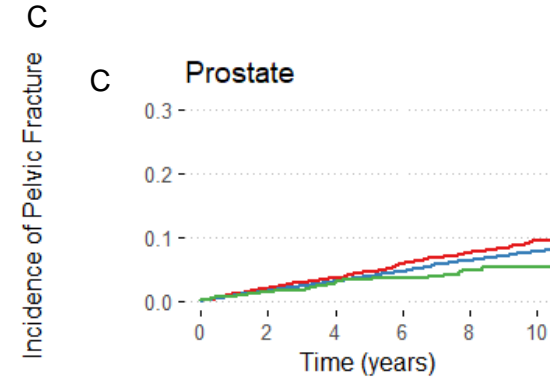

Number at risk

|              |      |       |      |      |      |     |
|--------------|------|-------|------|------|------|-----|
| 3DRT         | 1647 | 2369  | 2067 | 1682 | 1166 | 398 |
| IMRT         | 3084 | 11195 | 8231 | 5267 | 2457 | 531 |
| Brachy Alone | 630  | 747   | 621  | 469  | 265  | 62  |

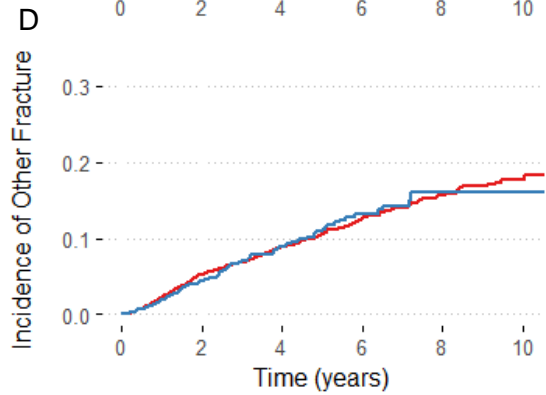

Number at risk

|      |      |      |      |      |     |     |
|------|------|------|------|------|-----|-----|
| 3DRT | 4019 | 2743 | 1721 | 1041 | 548 | 164 |
| IMRT | 1795 | 1092 | 523  | 190  | 56  | 11  |

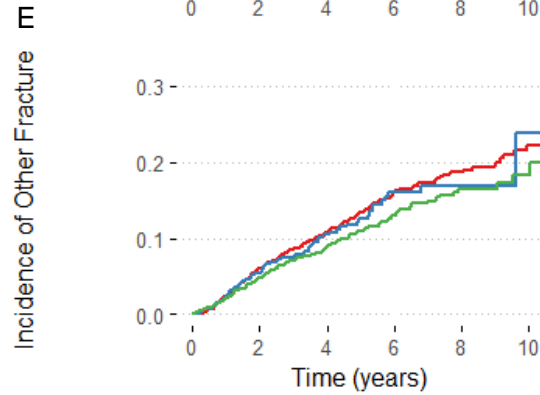

Number at risk

|              |      |      |      |     |     |     |
|--------------|------|------|------|-----|-----|-----|
| 3DRT         | 1755 | 1775 | 1120 | 702 | 373 | 113 |
| IMRT         | 296  | 720  | 329  | 143 | 48  | ≤10 |
| Brachy Alone | 928  | 1450 | 864  | 450 | 208 | 56  |

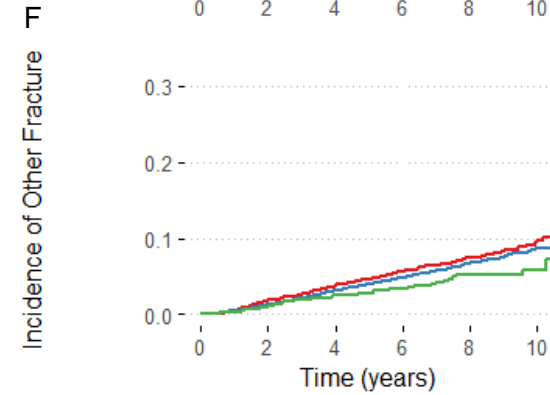

Number at risk

|              |      |       |      |      |      |     |
|--------------|------|-------|------|------|------|-----|
| 3DRT         | 1647 | 2413  | 2107 | 1743 | 1279 | 578 |
| IMRT         | 3084 | 11610 | 8751 | 5809 | 2970 | 819 |
| Brachy Alone | 630  | 766   | 653  | 505  | 315  | 101 |

**Supplementary Figure 2. Incidence of Pelvic and Non-Pelvic Fractures by Type of RT\*:** Incidence of pelvic fractures (a-c) and non-pelvic fractures (d-f) for gastrointestinal (a,d), gynecologic (b,e) and prostate (c,f) cancer by type of radiation therapy. Abbreviations: 3DRT, 3D conformal radiation therapy; IMRT, intensity modulated radiation therapy; Brachy, brachytherapy. \* T<sub>0</sub> set as date of RT start.
